# Supplementary material for: Atomic scale dynamics of ultrasmall germanium clusters
Source: PubMed Central journal article supplement — Nat Commun. 2012 Jun 12;3:897–. doi: 10.1038/ncomms1887 (PMC3621408; doi:10.1038/ncomms1887), 2012-06-12
Supplement: ncomms1887-s1.pdf [file ncomms1887-s1.pdf]

## Supplementary Information

### *Supplementary Figures:*

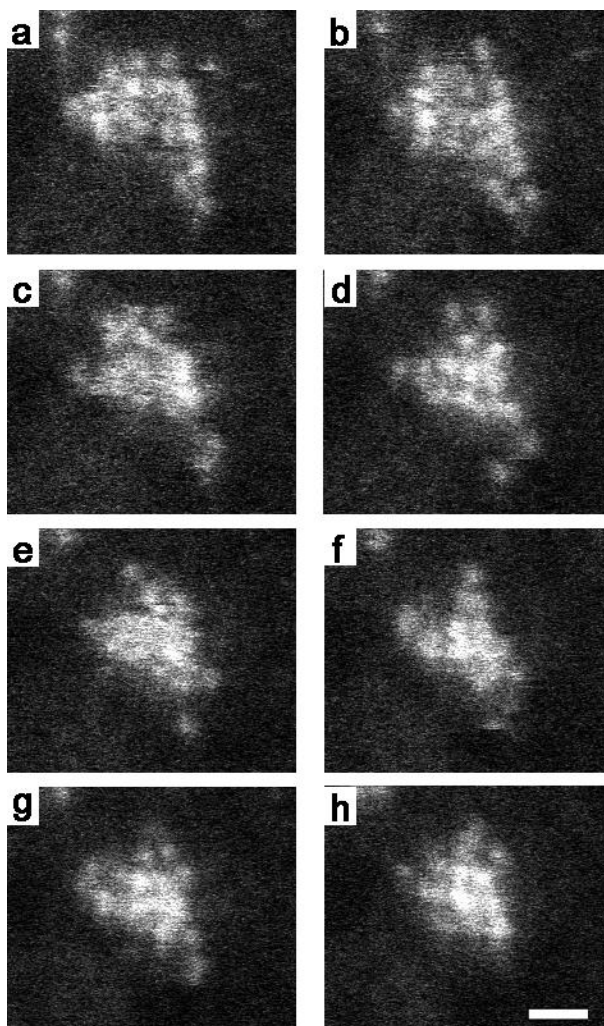

### **Supplementary Figure S1: Sequence of HAADF-STEM images of a Ge cluster.**

Sequence of HAADF-STEM images of a Ge cluster. Each image is acquired with a frame time of 0.1s. It can be seen that a 2D-like configuration transforms into a 3D configuration. The scale bar in h) corresponds to 0.5 nm.

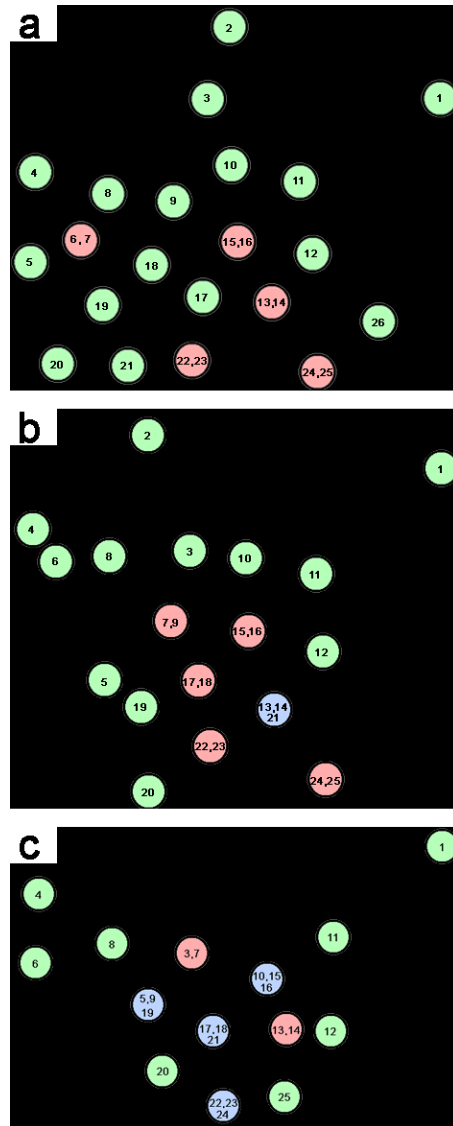

**Supplementary Figure S2: Possible pathway of atoms in the cluster during transformation.** Pathway of the atoms during the transformation of a 2D configuration to a 3D configuration. Green, red and blue dots correspond to 1, 2, and 3 atoms respectively.
